# Supplementary material
Source: PubMed Central journal article supplement (PMC3391149)

## SUPPLEMENTAL DATA

Exploring the structural basis of substrate preferences in Baeyer-Villiger  
monooxygenases: insight from steroid monooxygenase

Stefano Franceschini<sup>1</sup>, Hugo L. van Beek<sup>2</sup>, Alessandra Pennetta<sup>1</sup>, Christian Martinoli<sup>1</sup>,

Marco W. Fraaije<sup>2\*</sup>, Andrea Mattevi<sup>1\*</sup>

<sup>1</sup>Department of Biology and Biotechnology, University of Pavia, Via Ferrata 9, 27100 Pavia, Italy

<sup>2</sup>Laboratory of Biochemistry, Groningen Biomolecular Sciences and Biotechnology Institute,  
University of Groningen, Nijenborgh 4, 9747 AG Groningen, The Netherlands

**Running Title:** Steroid monooxygenase from *Rhodococcus rhodochrous*

## SUPPLEMENTARY FIGURES

**Figure S1.** Quality of the final electron density with reference to the crystal structure of STMO bound to NADP<sup>+</sup> (Table 1). The density was calculated with weighted 2Fo-Fc coefficients and is contoured at 1.3  $\sigma$  level. Carbons are in purple, nitrogens in blue, oxygens in red, sulfurs in yellow, and phosphorous in orange.

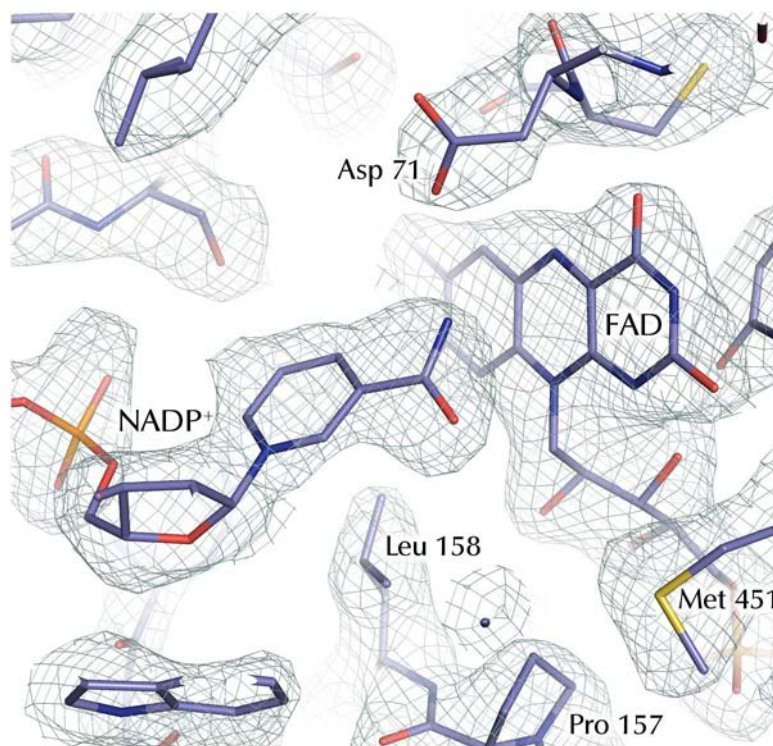

**Figure S2.** Superposition of STMO (blue ribbon) and CHMO (green ribbon; open conformation; PDB entry 3GWF) active sites. FAD and NADP<sup>+</sup> of STMO are depicted with yellow and orange carbons, respectively. The C $\alpha$  atoms of the STMO residues targeted by mutagenesis are shown as blue spheres (Table 3).

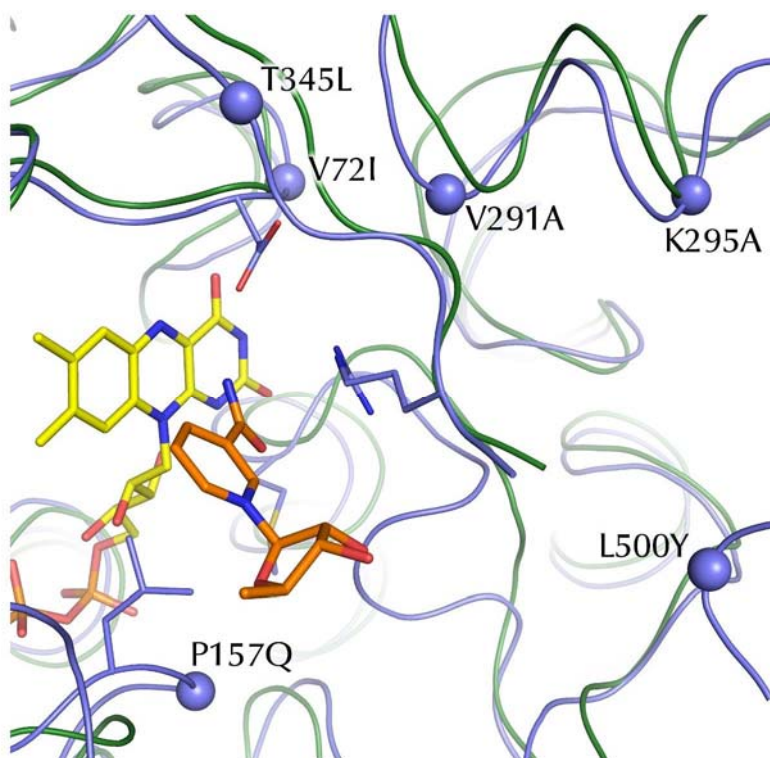

Supplement: supp_M112.372177_jbc.M112.372177-1.pdf [file supp_M112.372177_jbc.M112.372177-1.pdf]
